# Supplementary material for: One-pot synthesis of a RGO-supported ultrafine ternary PtAuRu catalyst with high electrocatalytic activity towards methanol oxidation in alkaline medium
Source: Royal Society of Chemistry journal article supplement (doi:10.1039/c3ta11291h), 2013-01-01
Supplement: c3ta11291h.pdf [file c3ta11291h.pdf]

## Supplementary Information

### One-pot synthesis of RGO-supported ultrafine ternary PtAuRu catalyst with high electrocatalytic activity towards methanol oxidation in alkaline medium

Fangfang Ren,<sup>a</sup> Caiqin Wang,<sup>a</sup> Chunyang Zhai,<sup>a</sup> Fengxing Jiang,<sup>a,b</sup> Ruirui Yue,<sup>a,b</sup> Yukou Du,<sup>\*a</sup> Ping Yang<sup>a</sup> and Jingkun Xu<sup>\*b</sup>

<sup>a</sup> College of Chemistry, Chemical Engineering and Materials Science, Soochow University, Suzhou 215123, P. R. China

<sup>b</sup> Jiangxi Key Laboratory of Organic Chemistry, Jiangxi Science and Technology Normal University, Nanchang, 330013, P. R. China

E-mail: duyk@suda.edu.cn, xujingkun@tsinghua.org.cn

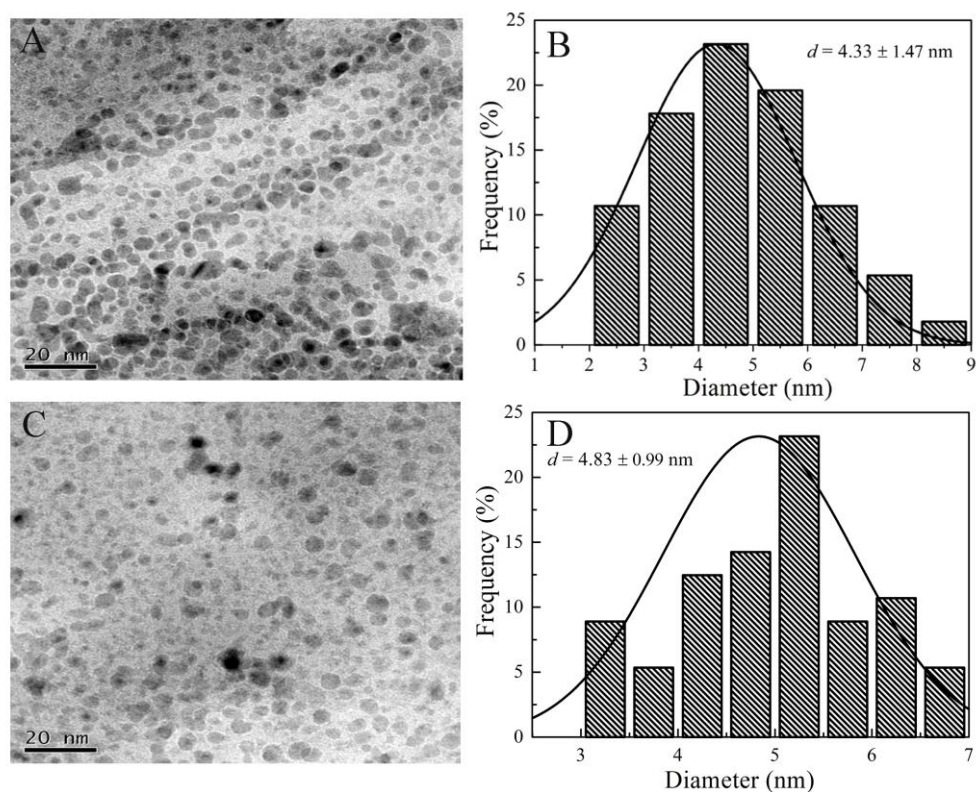

**Fig. S1** TEM images of PtAu/RGO (A) and PtRu/RGO catalyst (C); histogram of the size of the PtAu (B) and PtRu nanoparticles (D).

Fig. S1 shows the TEM images of PtAu/RGO (A) and PtRu/RGO catalyst (C). It can be seen that PtAu and PtRu nanoparticles are uniformly distributed on the RGO

surface without obvious agglomerations. In addition, the particle size distribution of PtAu/RGO (B) and PtRu/RGO catalyst (D) shows that the average diameter of PtAu and PtRu nanoparticles are  $4.33 \pm 1.47$  nm and  $4.83 \pm 0.99$  nm, respectively.

**Table S1** Summary of the size and composition data for the catalysts

| Catalysts  | Metal loading ( $\mu\text{g cm}^{-2}$ ) of |      |     | Yield (%) |     |     | Molar ratio    | Particle diameter<br>by TEM (nm) |
|------------|--------------------------------------------|------|-----|-----------|-----|-----|----------------|----------------------------------|
|            | four electrodes                            |      |     | Pt        | Au  | Ru  |                |                                  |
|            | Pt                                         | Au   | Ru  |           |     |     |                |                                  |
| Pt/RGO     | 12.2                                       | —    | —   | 98%       | —   | —   | —              | —                                |
| PtAu/RGO   | 12.2                                       | 11.9 | —   | 98%       | 95% | —   | 1.00:0.97      | $4.33 \pm 1.47$                  |
| PtRu/RGO   | 12.2                                       | —    | 3.0 | 98%       | —   | 46% | 1.00:0.47      | $4.83 \pm 0.99$                  |
| PtAuRu/RGO | 12.2                                       | 12.0 | 3.1 | 98%       | 96% | 48% | 1.00:0.98:0.50 | $3.09 \pm 0.73$                  |
